# Supplementary material for: Mass mortality in freshwater mussels (Actinonaias pectorosa) in the Clinch River, USA, linked to a novel densovirus
Source: PubMed Central journal article supplement (PMC7468154; doi:10.1038/s41598-020-71459-z), 2020-09-02
Supplement: 41598_2020_71459_MOESM1_ESM.pdf [file 41598_2020_71459_MOESM1_ESM.pdf]

## SUPPLEMENTARY INFORMATION<sup>1</sup>

Mass mortality in freshwater mussels (*Actinonaias pectorosa*) in the Clinch River, USA, linked to a novel densovirus

Jordan Richard<sup>1,3</sup>, Eric Leis<sup>2</sup>, Christopher D. Dunn<sup>3</sup>, Rose Agbalog<sup>1</sup>, Diane Waller<sup>4</sup>, Susan Knowles<sup>5</sup>, Joel Putnam<sup>4</sup>, and Tony L. Goldberg<sup>3,6\*</sup>

<sup>1</sup>U.S. Fish and Wildlife Service, Southwestern Virginia Field Office, 330 Cummings Street, Abingdon, VA 24210. <sup>2</sup>La Crosse Fish Health Center, Midwest Fisheries Center, U.S. Fish and Wildlife Service, 555 Lester Ave, Onalaska, WI, 54650. <sup>3</sup>Department of Pathobiological Sciences, University of Wisconsin-Madison, 1656 Linden Drive, Madison WI 53706. <sup>4</sup>U.S. Geological Survey, Upper Midwest Environmental Sciences Center, 2630 Fanta Reed Rd, La Crosse WI, 54603. <sup>5</sup>US Geological Survey, National Wildlife Health Center, 6006 Schroeder Rd, Madison, WI 53711. <sup>6</sup>Global Health Institute, University of Wisconsin-Madison, 1300 University Avenue, Madison WI 53706

\*Correspondence and requests for materials should be addressed to Tony L. Goldberg, Department of Pathobiological Sciences, University of Wisconsin-Madison, 1656 Linden Drive, Madison, Wisconsin 53706, USA. Email: [tony.goldberg@wisc.edu](mailto:tony.goldberg@wisc.edu); Phone: +1-608-890-2618; Fax: +1-608-262-7420.

**Table S1.** Details of Clinch River pheasantshells (*Actinonaias pectorosa*) used in the analyses

**Table S2.** Loads of 17 viruses in Clinch River pheasantshells (*Actinonaias pectorosa*)

**Figure S1.** Maximum likelihood phylogenetic trees of 17 viruses identified in Clinch River pheasantshells (*Actinonaias pectorosa*) and their relatives in the GenBank database. Taxon names indicate host, country, year of collection, and GenBank accession number; see Table 2 for additional details. Viruses identified in the present study are shown in bold type. Numbers beside branches are bootstrap values representing statistical confidence in clades based on 1000 resamplings of the data; only bootstrap values  $\geq 50\%$  are shown. Scale bars indicate nucleotide substitutions per site.

<sup>1</sup>Any use of trade, firm, or product names is for descriptive purposes only and does not imply endorsement by the U.S. Government.

### A) Densoviruses

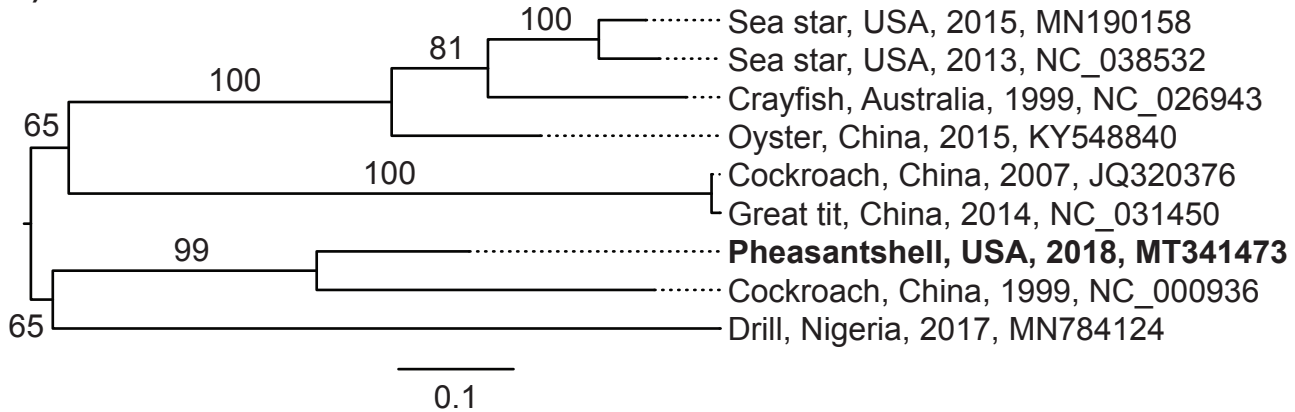

### B) Narna-like viruses

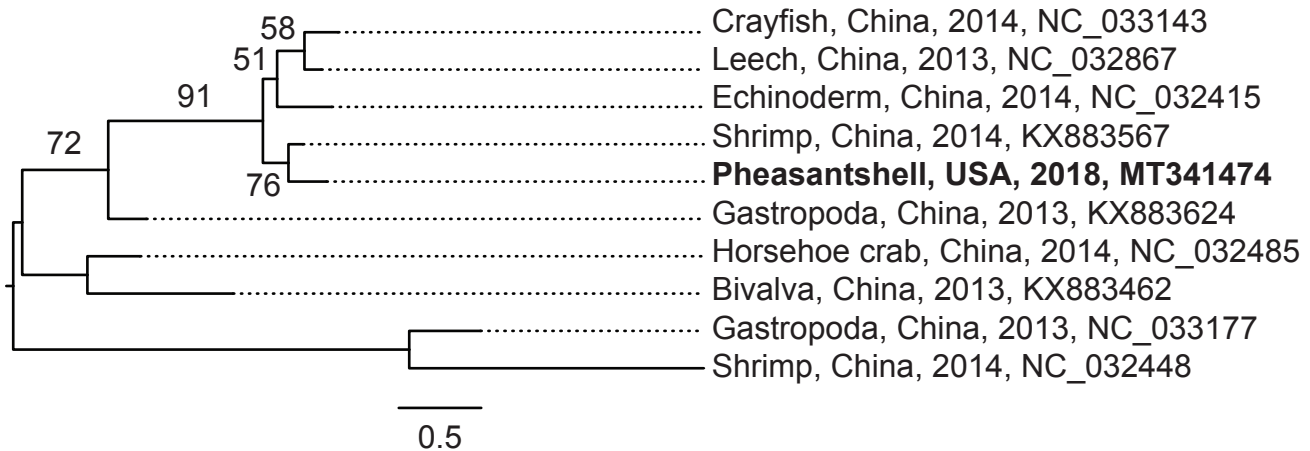

### C) Noda-like viruses

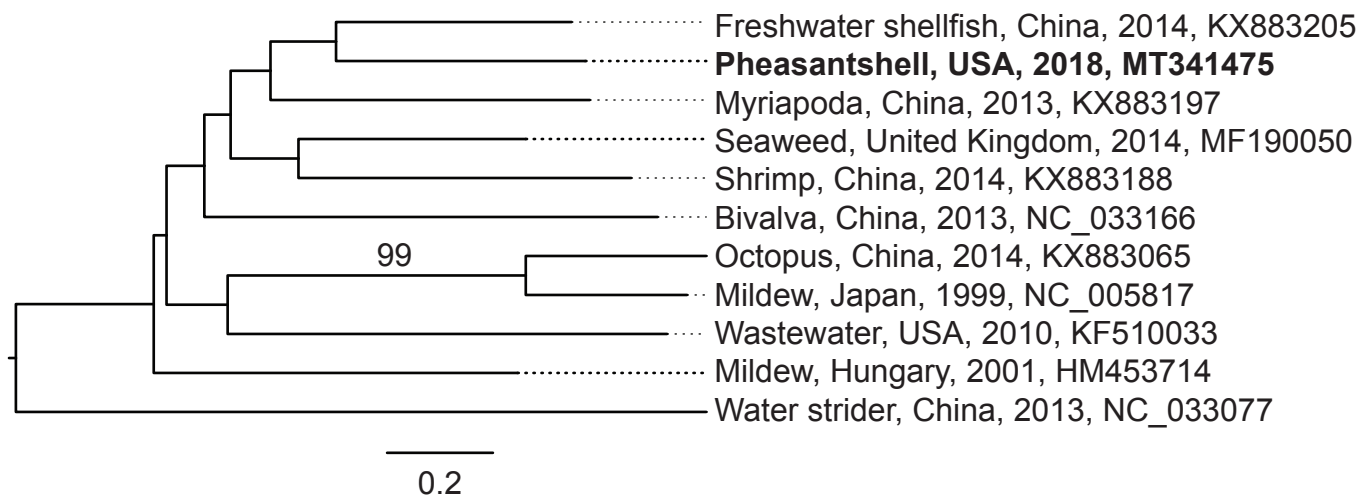

**D) Picorna-like viruses (1)**

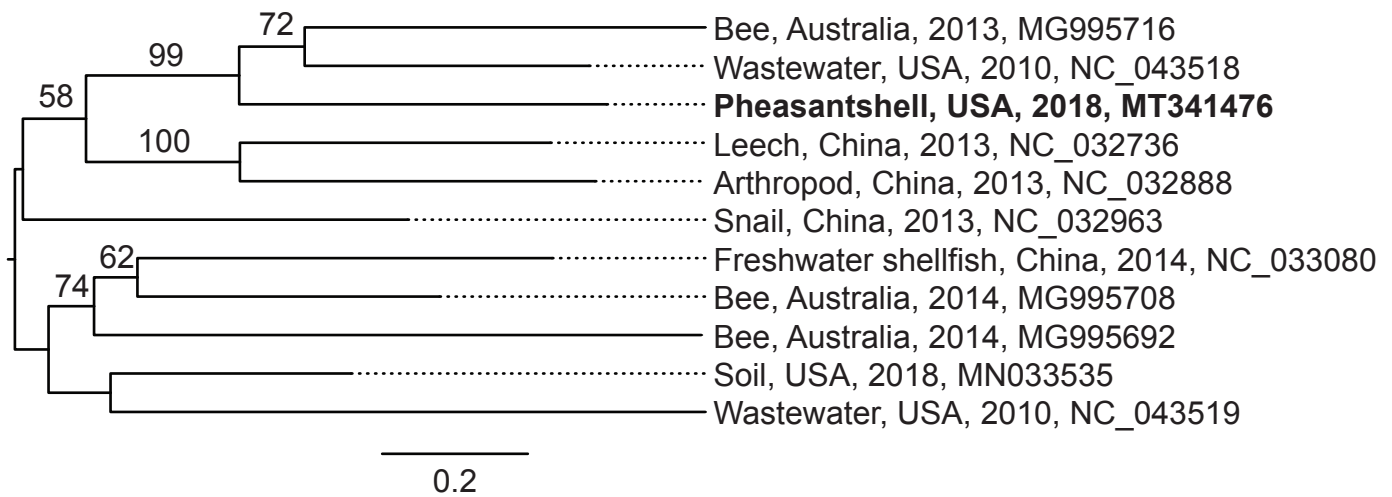

**E) CRESS viruses**

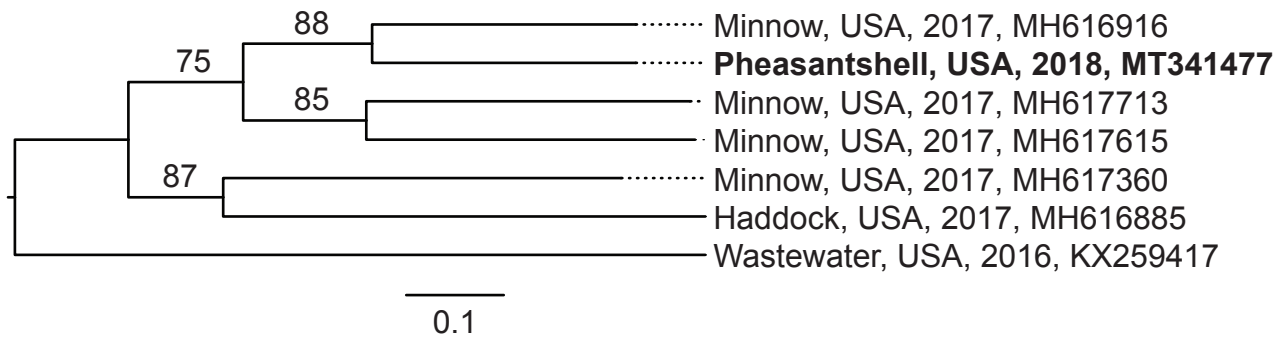

**F) Picorna-like viruses (2)**

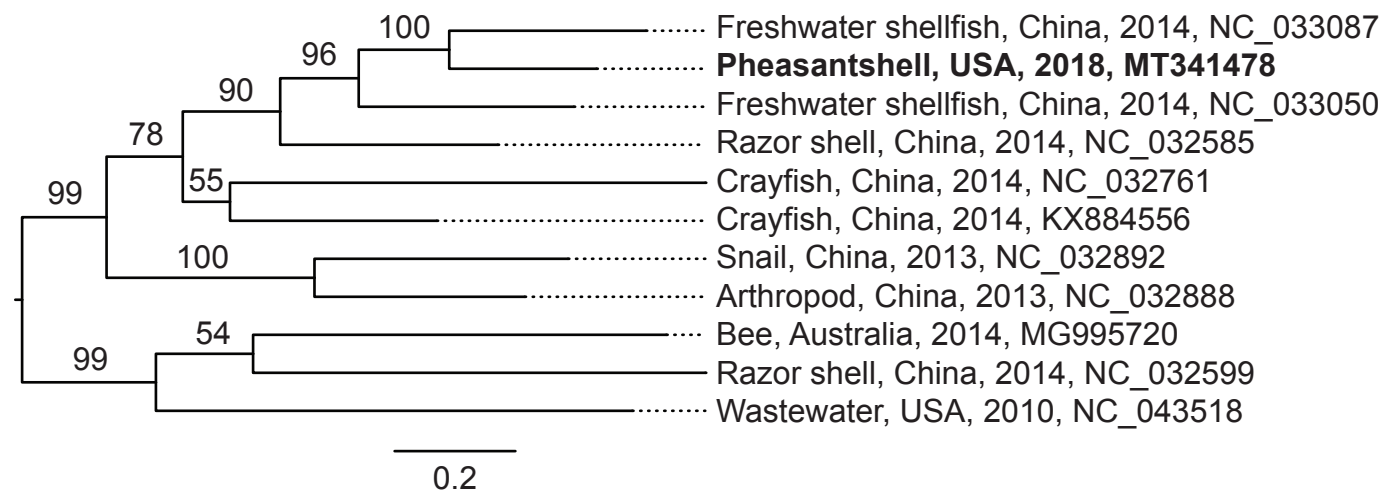

### G) Picorna-like viruses (3)

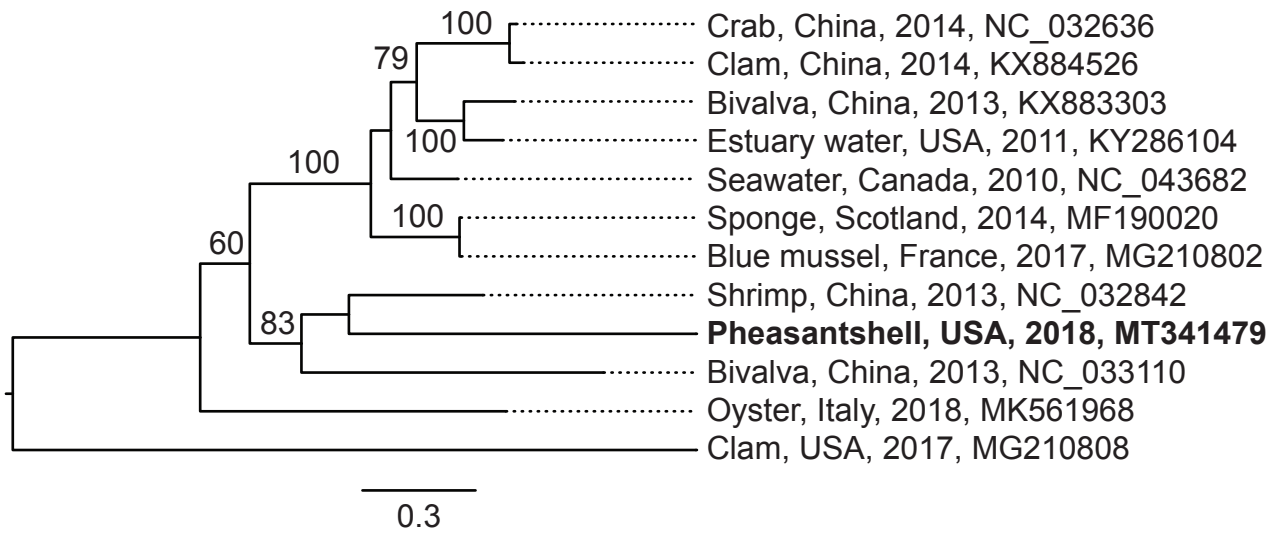

### H) Circular viruses (1)

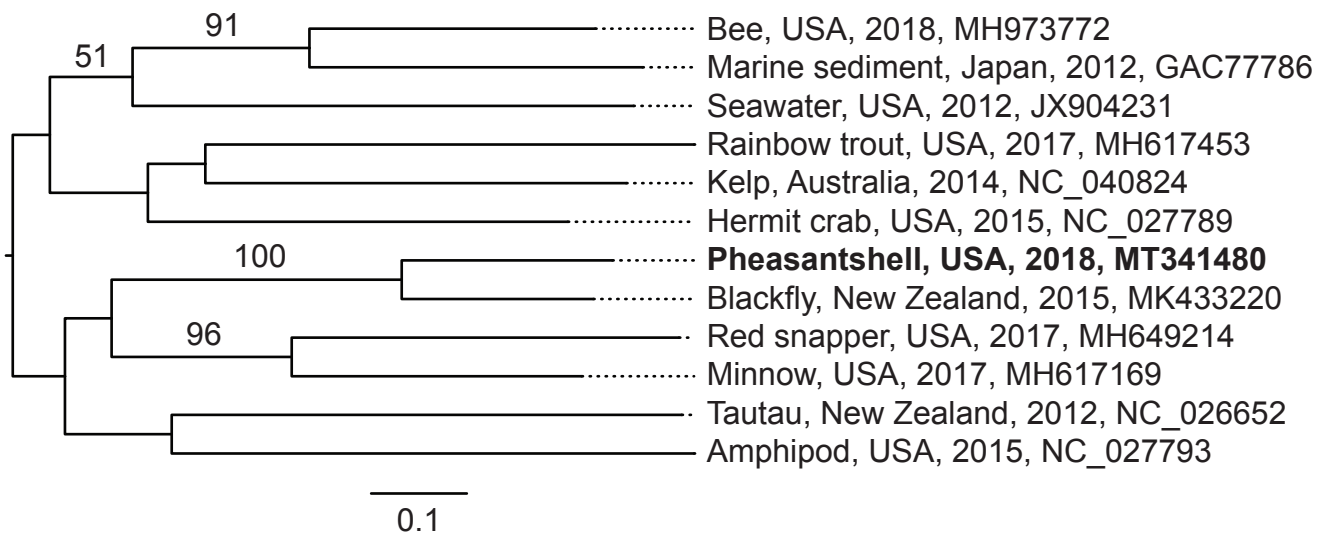

### I) Caliciviruses

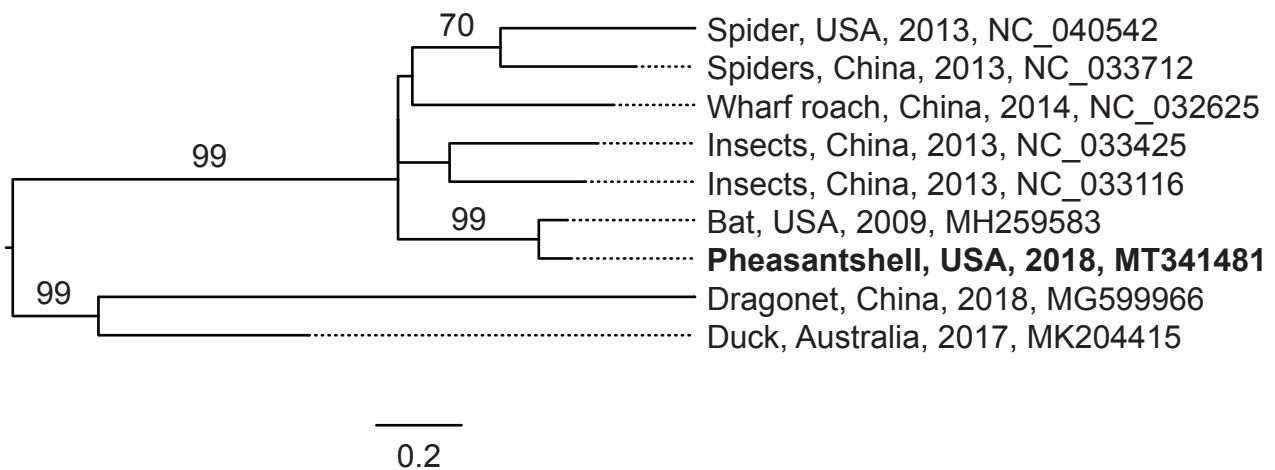

### J) Circular viruses (2)

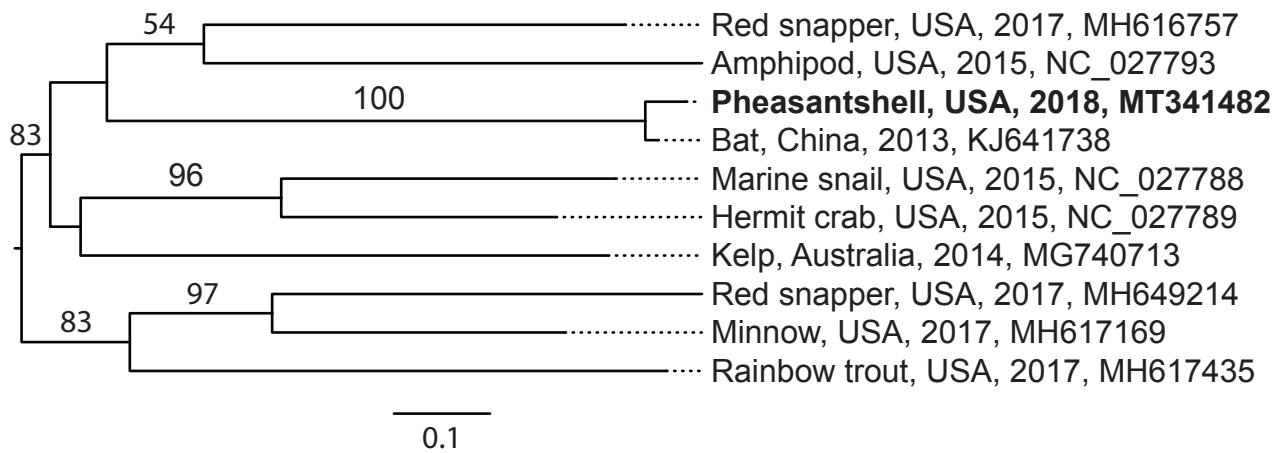

### K) Dicistro-like viruses (1)

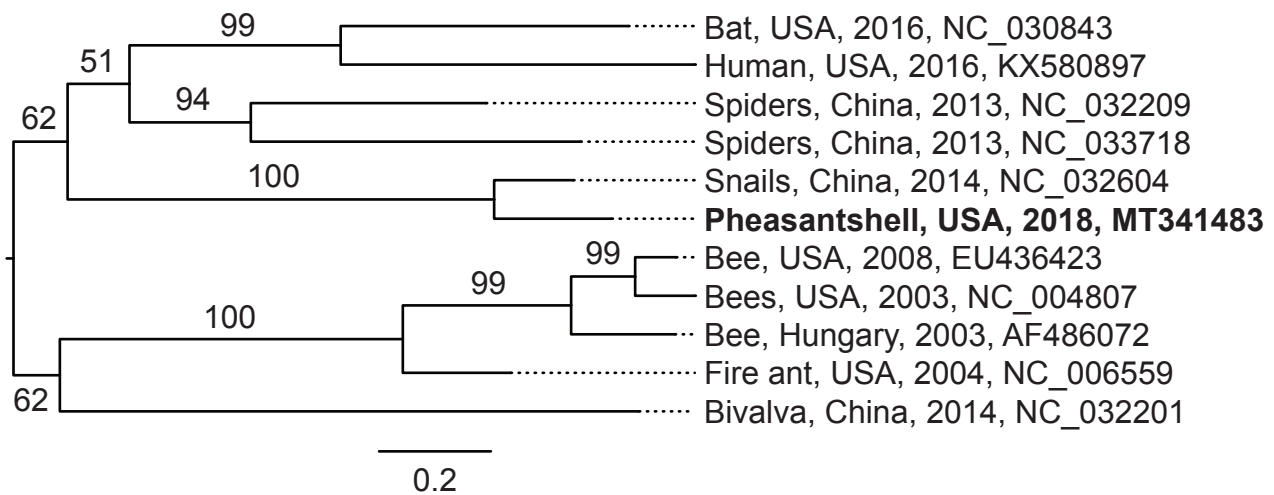

### L) Tombus-like viruses

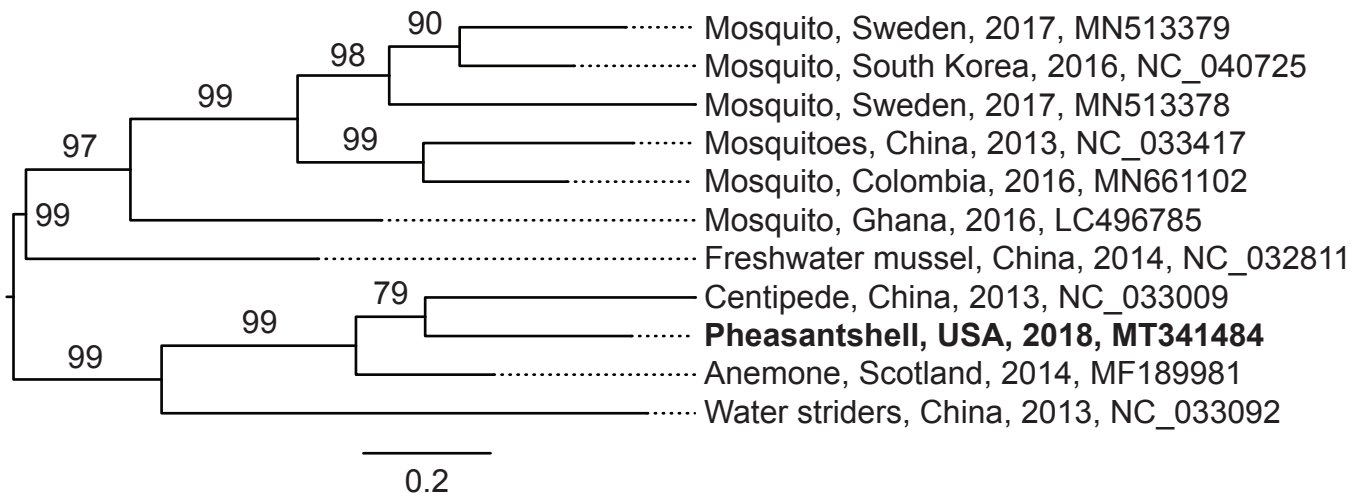

### M) Sobemo-like viruses

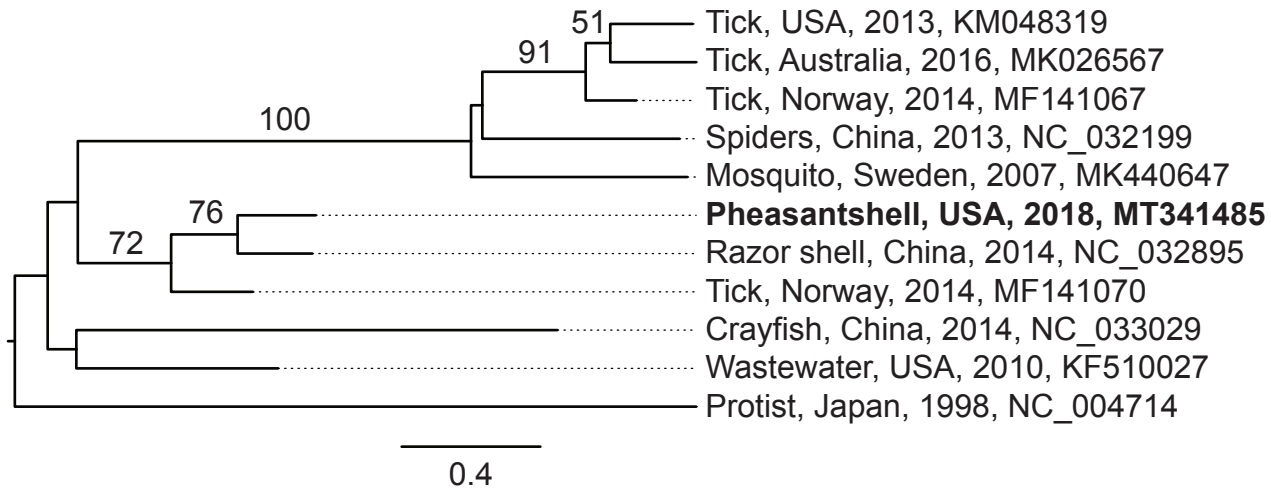

### N) Dicistro-like viruses (2)

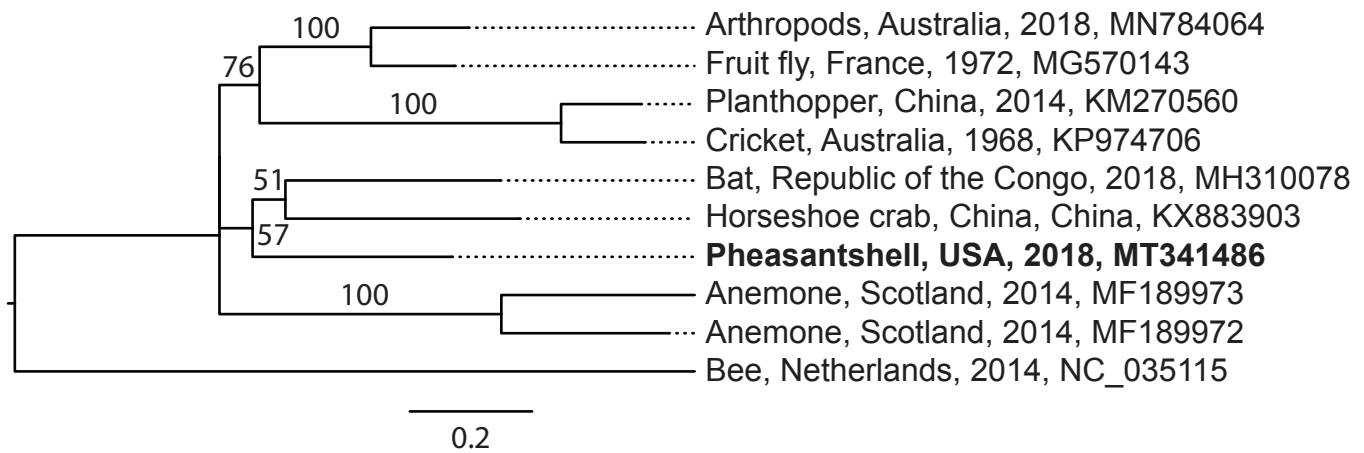

### O) Picobirnaviruses

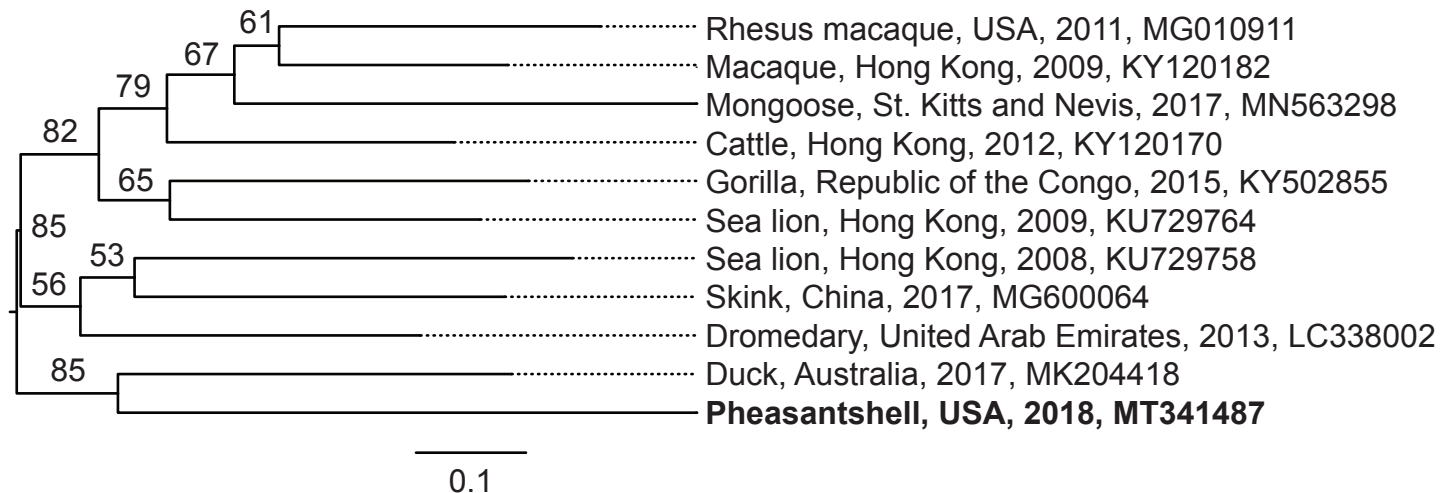

**P) Picobirna-like viruses**

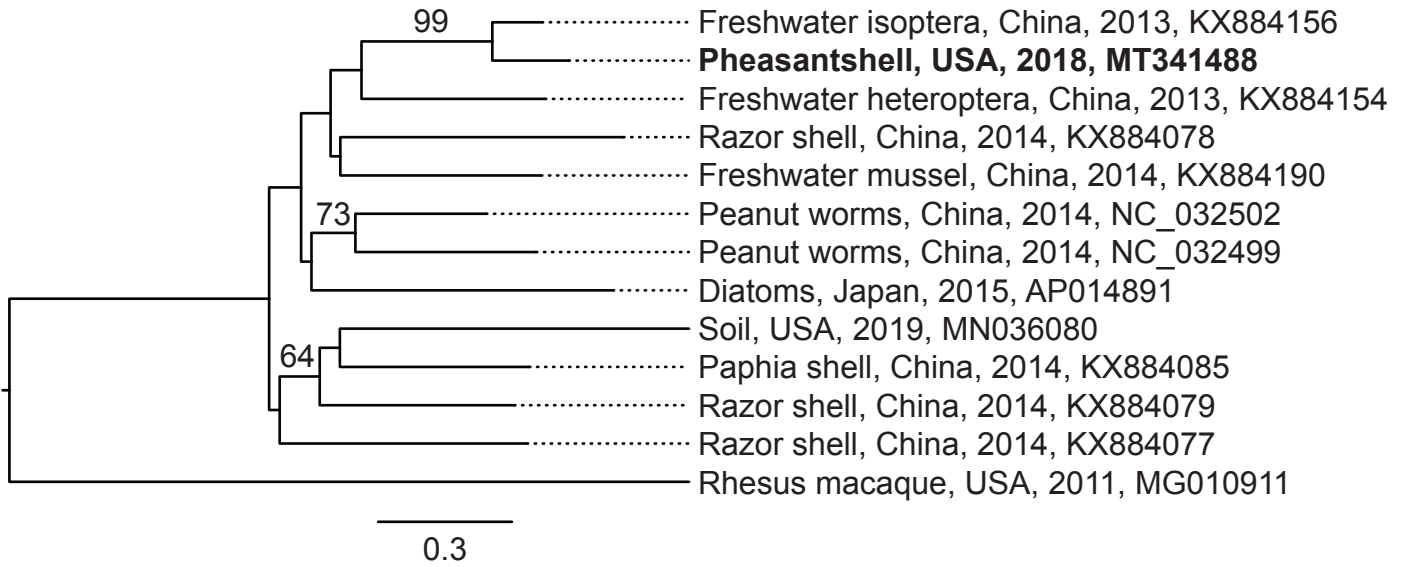

**Q) Totiviruses**

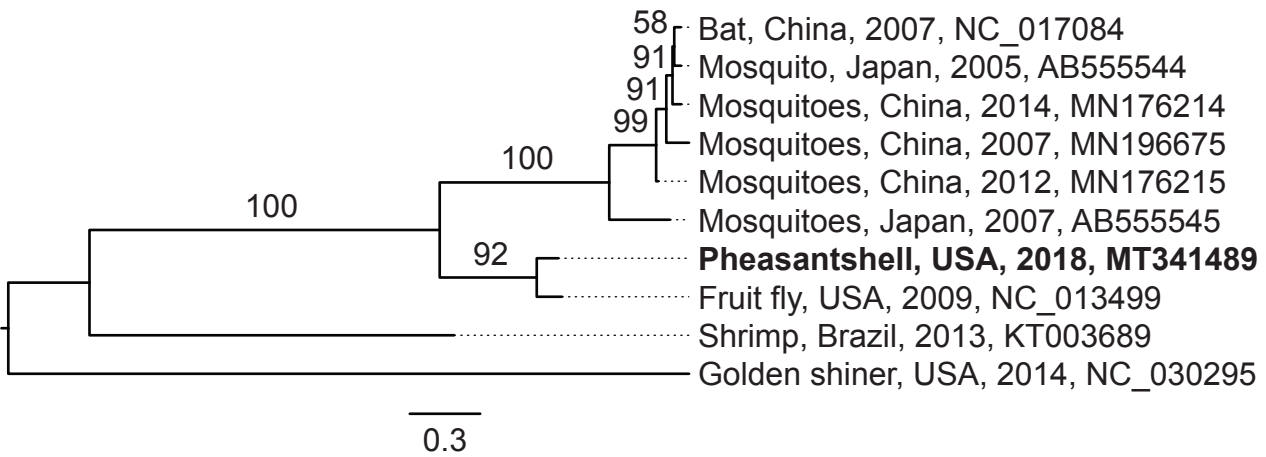

**Table S1.** Details of Clinch River pheasantshells (*Actinonaias pectorosa*) used in the analyses

| Accession          | Short ID | Status  | Date     | Location        | Condition <sup>1</sup> | Length (mm) | Gravid <sup>2</sup> |
|--------------------|----------|---------|----------|-----------------|------------------------|-------------|---------------------|
| AP102017-037       | Y37      | Case    | 10/20/17 | Frost Ford      |                        | 96.0        |                     |
| AP102017-043       | Y43      | Case    | 10/20/17 | Kyle's Ford     |                        | 97.0        |                     |
| AP102017-065       | Y65      | Case    | 10/20/17 | Kyle's Ford     |                        | 90.0        |                     |
| AP102017-066       | Y66      | Case    | 10/20/17 | Kyle's Ford     |                        | 92.5        |                     |
| AP110317-001       | Z01      | Case    | 11/3/17  | Kyle's Ford     |                        | 71.0        |                     |
| AP110317-002       | Z02      | Case    | 11/3/17  | Kyle's Ford     |                        | 72.0        |                     |
| AP110317-005       | Z05      | Case    | 11/3/17  | Kyle's Ford     |                        | 75.0        |                     |
| AP110317-006       | Z06      | Case    | 11/3/17  | Kyle's Ford     |                        | 90.0        |                     |
| AP110317-008       | Z08      | Case    | 11/3/17  | Kyle's Ford     |                        | 74.0        |                     |
| AP110317-016       | Z16      | Case    | 11/3/17  | Wallen's Bend   |                        | 80.0        |                     |
| AP110317-003       | Z03      | Case    | 11/3/17  | Kyle's Ford     |                        | 72.0        |                     |
| 20180925SIAPE-0007 | B32      | Case    | 9/25/18  | Sycamore Island | 4                      | 95.0        | Yes                 |
| 20180925SIAPE-0011 | B36      | Case    | 9/25/18  | Sycamore Island | 5                      | 69.0        |                     |
| 20180925SIAPE-0012 | B37      | Case    | 9/25/18  | Sycamore Island | 5                      | 91.0        | No                  |
| 20180925SIAPE-0014 | B39      | Case    | 9/25/18  | Sycamore Island | 4                      | 96.0        |                     |
| 20180925SIAPE-0015 | B40      | Case    | 9/25/18  | Sycamore Island | 5                      | 101.0       | Yes                 |
| 20181024SFape-0001 | C16      | Case    | 10/24/18 | Speers Ferry    | 4                      | 103.0       | No                  |
| 20181025SIAPE-0012 | C47      | Case    | 10/25/18 | Sycamore Island | 4                      | 78.0        | No                  |
| 20181025SIAPE-0013 | C48      | Case    | 10/25/18 | Sycamore Island | 4                      | 86.0        | Yes                 |
| 20181025SIAPE-0021 | C59      | Case    | 10/25/18 | Sycamore Island | 4                      | 97.0        | No                  |
| 20181025KFAPE-0007 | C69      | Case    | 10/25/18 | Kyle's Ford     | 4                      | 73.0        | No                  |
| 20181025KFAPE-0011 | C73      | Case    | 10/25/18 | Kyle's Ford     | 4                      | 70.0        | No                  |
| 20181025KFAPE-0012 | C74      | Case    | 10/25/18 | Kyle's Ford     | 3                      | 83.0        | No                  |
| 20181025KFAPE-0014 | C76      | Case    | 10/25/18 | Kyle's Ford     | 3                      | 88.0        | Yes                 |
| 20181025KFAPE-0015 | C77      | Case    | 10/25/18 | Kyle's Ford     | 2                      | 74.5        | No                  |
| 20181025KFAPE-0016 | C78      | Case    | 10/25/18 | Kyle's Ford     | 3                      | 94.0        | Yes                 |
| AP102017-005       | Y05      | Control | 10/20/17 | Sycamore Island |                        | 104.0       |                     |
| AP102017-015       | Y15      | Control | 10/20/17 | Wallen's Bend   |                        | 84.0        |                     |
| AP102017-027       | Y27      | Control | 10/20/17 | Frost Ford      |                        | 89.0        |                     |
| AP102017-044       | Y44      | Control | 10/20/17 | Kyle's Ford     |                        | 85.5        |                     |
| AP110317-009       | Z09      | Control | 11/3/17  | Kyle's Ford     |                        | 94.0        |                     |
| AP110317-010       | Z10      | Control | 11/3/17  | Kyle's Ford     |                        | 61.0        |                     |
| AP110317-013       | Z13      | Control | 11/3/17  | Wallen's Bend   |                        | 61.0        |                     |
| AP110317-015       | Z15      | Control | 11/3/17  | Wallen's Bend   |                        | 84.0        |                     |
| 20180816SIAPE-0002 | A10      | Control | 8/16/18  | Sycamore Island | 4                      | 96.0        | Yes                 |
| 20180816SIAPE-0008 | A16      | Control | 8/16/18  | Sycamore Island | 5                      | 95.7        | No                  |
| 20180816WBAPE-0007 | A23      | Control | 8/16/18  | Wallen's Bend   | 4                      | 91.6        | No                  |
| 20180816KFAPE-0002 | A34      | Control | 8/16/18  | Kyle's Ford     |                        | 99.4        | No                  |
| 20180816KFAPE-0006 | A38      | Control | 8/16/18  | Kyle's Ford     | 5                      | 83.8        | No                  |
| 20180925ARAPE-0004 | B04      | Control | 9/25/18  | Artrip          | 4                      | 95.0        | Yes                 |
| 20180925SFape-0004 | B17      | Control | 9/25/18  | Speers Ferry    | 4                      | 85.0        | Yes                 |
| 20180925SIAPE-0002 | B26      | Control | 9/25/18  | Sycamore Island | 4                      | 92.0        | Yes                 |
| 20180925SIAPE-0003 | B27      | Control | 9/25/18  | Sycamore Island | 4                      | 97.0        | Yes                 |
| 20180925SIAPE-0004 | B28      | Control | 9/25/18  | Sycamore Island | 5                      | 91.0        | Yes                 |
| 20180925SIAPE-0006 | B31      | Control | 9/25/18  | Sycamore Island | 5                      | 104.0       | No                  |
| 20180925WBAPE-0002 | B44      | Control | 9/25/18  | Wallen's Bend   | 4                      | 84.4        | No                  |
| 20181025SIAPE-0002 | C36      | Control | 9/25/18  | Sycamore Island | 5                      | 93.0        | No                  |
| 20181025KFAPE-0001 | C63      | Control | 9/25/18  | Kyle's Ford     | 4                      | 70.0        | No                  |
| 20181025KFAPE-0002 | C64      | Control | 9/25/18  | Kyle's Ford     | 3                      | 88.0        | Yes                 |
| 20180925KFAPE-0020 | B71      | Control | 9/26/18  | Kyle's Ford     | 4                      | 62.0        | No                  |
| 20180925KFAPE-0022 | B73      | Control | 9/26/18  | Kyle's Ford     | 3                      | 78.0        | No                  |
| 20180925KFAPE-0024 | B75      | Control | 9/26/18  | Kyle's Ford     | 5                      | 60.0        | No                  |
| 20181024ARAPE-0004 | C04      | Control | 10/24/18 | Artrip          | 4                      | 106.0       | Yes                 |
| 20181024SFape-0013 | C33      | Control | 10/24/18 | Speers Ferry    | 5                      | 82.0        | No                  |
| 20181025KFAPE-0004 | C66      | Control | 10/25/18 | Kyle's Ford     | 4                      | 76.0        | No                  |
| 20181025KFAPE-0008 | C70      | Control | 10/25/18 | Kyle's Ford     | 3                      | 58.0        | No                  |
| 20181025KFAPE-0009 | C71      | Control | 10/25/18 | Kyle's Ford     | 3                      | 50.0        | No                  |
| 20181025KFAPE-0013 | C75      | Control | 10/25/18 | Kyle's Ford     | 3                      | 88.0        | Yes                 |

<sup>1</sup>Body condition score was ranked on an ordinal scale of 1 (poor) to 5 (excellent). Blank cells represent missing data.<sup>2</sup>Reproductive status (gravid or not gravid) was assessed during physical examination. Blank cells represent missing data.



**Table S2.** Loads of 17 viruses in Clinch River pheasantshells (*Actinonaias pectorosa*)

| Short ID <sup>2</sup> | Status  | Virus <sup>1</sup> |      |      |      |      |      |      |      |      |      |      |      |      |      |      |      |      |
|-----------------------|---------|--------------------|------|------|------|------|------|------|------|------|------|------|------|------|------|------|------|------|
|                       |         | A                  | B    | C    | D    | E    | F    | G    | H    | I    | J    | K    | L    | M    | N    | O    | P    | Q    |
| Y37                   | Case    | 0.83               | 0.00 | 0.00 | 0.00 | 0.00 | 0.00 | 0.00 | 0.00 | 0.00 | 0.00 | 0.00 | 0.00 | 0.00 | 0.00 | 0.00 | 0.00 | 0.00 |
| Y43                   | Case    | 1.24               | 0.30 | 0.15 | 2.17 | 0.00 | 1.60 | 0.24 | 1.43 | 0.59 | 0.00 | 0.00 | 0.34 | 0.00 | 0.21 | 0.00 | 0.00 | 0.00 |
| Y65                   | Case    | 0.48               | 0.00 | 0.00 | 1.52 | 0.00 | 0.42 | 0.00 | 0.00 | 0.00 | 0.98 | 0.00 | 0.00 | 0.00 | 0.00 | 0.00 | 0.00 | 0.00 |
| Y66                   | Case    | 1.48               | 0.00 | 0.00 | 0.00 | 0.27 | 0.00 | 0.00 | 0.00 | 0.00 | 0.00 | 0.00 | 0.00 | 0.00 | 0.00 | 0.00 | 0.00 | 0.00 |
| Z01                   | Case    | 0.18               | 0.00 | 0.00 | 0.00 | 0.00 | 0.00 | 0.00 | 0.00 | 0.00 | 0.00 | 0.00 | 0.00 | 0.00 | 0.00 | 0.00 | 0.00 | 0.00 |
| Z02                   | Case    | 1.44               | 0.12 | 0.00 | 1.16 | 0.42 | 0.00 | 0.00 | 0.78 | 0.00 | 0.00 | 0.00 | 0.00 | 0.00 | 0.00 | 0.00 | 0.00 | 0.00 |
| Z05                   | Case    | 1.93               | 0.00 | 0.00 | 0.00 | 0.00 | 0.00 | 0.00 | 0.40 | 0.00 | 0.00 | 0.00 | 0.00 | 0.00 | 0.00 | 0.00 | 0.00 | 0.00 |
| Z06                   | Case    | 0.00               | 0.00 | 0.00 | 0.06 | 0.00 | 0.00 | 0.00 | 0.00 | 0.00 | 0.43 | 0.00 | 0.00 | 0.00 | 0.00 | 0.00 | 0.00 | 0.00 |
| Z08                   | Case    | 0.00               | 0.00 | 0.00 | 0.06 | 0.41 | 0.28 | 0.00 | 0.00 | 0.00 | 0.93 | 0.00 | 0.00 | 0.00 | 0.00 | 0.00 | 0.00 | 0.00 |
| Z16                   | Case    | 0.00               | 0.00 | 0.00 | 0.00 | 0.00 | 0.00 | 0.00 | 0.00 | 0.00 | 0.51 | 0.00 | 0.00 | 0.00 | 0.00 | 0.00 | 0.00 | 0.00 |
| Z03                   | Case    | 0.00               | 0.00 | 0.00 | 1.51 | 0.00 | 0.11 | 0.00 | 0.00 | 0.38 | 0.00 | 0.00 | 0.00 | 0.00 | 0.00 | 0.00 | 0.00 | 0.00 |
| B32                   | Case    | 0.00               | 0.04 | 0.09 | 0.37 | 0.31 | 0.00 | 0.00 | 0.00 | 0.05 | 0.15 | 0.00 | 0.00 | 0.00 | 0.00 | 0.00 | 0.00 | 0.00 |
| B36                   | Case    | 1.67               | 0.00 | 0.00 | 0.11 | 2.13 | 0.00 | 0.00 | 0.00 | 0.00 | 0.20 | 0.10 | 0.00 | 0.00 | 0.00 | 0.00 | 0.00 | 0.00 |
| B37                   | Case    | 0.95               | 0.51 | 0.00 | 2.54 | 0.67 | 0.98 | 0.00 | 0.00 | 1.17 | 1.00 | 0.00 | 0.00 | 0.00 | 0.00 | 0.00 | 0.00 | 0.00 |
| B39                   | Case    | 1.32               | 0.00 | 0.00 | 0.66 | 1.54 | 0.00 | 0.00 | 0.00 | 0.00 | 1.08 | 0.00 | 0.00 | 0.00 | 0.00 | 0.00 | 0.00 | 0.00 |
| B40                   | Case    | 0.00               | 0.00 | 0.00 | 1.46 | 0.00 | 0.00 | 0.00 | 0.00 | 0.00 | 1.48 | 0.00 | 0.00 | 0.00 | 0.00 | 0.00 | 0.00 | 0.00 |
| C16                   | Case    | 0.00               | 0.00 | 0.00 | 0.00 | 0.00 | 0.00 | 0.00 | 0.00 | 0.00 | 0.00 | 0.00 | 0.00 | 0.00 | 0.00 | 0.00 | 0.00 | 0.00 |
| C47                   | Case    | 3.09               | 2.56 | 1.30 | 2.39 | 1.08 | 0.64 | 1.60 | 0.97 | 1.45 | 1.13 | 1.17 | 1.26 | 0.89 | 1.51 | 0.00 | 1.47 | 1.73 |
| C48                   | Case    | 0.72               | 0.00 | 0.00 | 1.07 | 1.20 | 0.94 | 0.00 | 0.65 | 0.14 | 2.29 | 0.00 | 0.09 | 0.00 | 0.00 | 0.00 | 0.00 | 0.00 |
| C59                   | Case    | 0.35               | 0.00 | 0.00 | 0.00 | 1.40 | 0.00 | 0.00 | 0.39 | 0.00 | 1.16 | 0.00 | 0.00 | 0.00 | 0.00 | 0.00 | 0.00 | 0.00 |
| C69                   | Case    | 0.55               | 0.00 | 0.00 | 0.11 | 0.79 | 0.18 | 0.13 | 0.77 | 0.00 | 1.24 | 0.00 | 0.00 | 0.00 | 0.00 | 1.05 | 0.00 | 0.00 |
| C73                   | Case    | 0.19               | 0.00 | 0.00 | 0.00 | 0.10 | 0.00 | 0.00 | 0.00 | 0.00 | 0.21 | 0.00 | 0.00 | 0.00 | 0.00 | 0.00 | 0.00 | 0.00 |
| C74                   | Case    | 0.95               | 0.00 | 0.00 | 0.00 | 0.81 | 0.00 | 0.00 | 0.62 | 0.00 | 0.97 | 0.00 | 0.00 | 0.00 | 0.00 | 0.00 | 0.00 | 0.00 |
| C76                   | Case    | 0.00               | 0.00 | 0.00 | 0.13 | 0.84 | 0.52 | 0.00 | 0.62 | 0.00 | 1.30 | 0.00 | 0.00 | 0.00 | 0.00 | 0.00 | 0.00 | 0.00 |
| C77                   | Case    | 0.32               | 0.00 | 0.00 | 0.00 | 1.71 | 0.00 | 0.00 | 0.00 | 0.00 | 0.92 | 0.00 | 0.00 | 0.00 | 0.00 | 0.00 | 0.00 | 0.00 |
| C78                   | Case    | 1.36               | 0.07 | 0.00 | 0.57 | 0.00 | 0.00 | 0.00 | 0.00 | 0.00 | 0.75 | 0.00 | 0.00 | 0.00 | 0.00 | 0.00 | 0.00 | 0.00 |
| Y05                   | Control | 0.00               | 0.00 | 0.00 | 0.00 | 0.00 | 0.00 | 0.00 | 0.00 | 0.00 | 0.00 | 0.00 | 0.00 | 0.00 | 0.00 | 0.00 | 0.00 | 0.00 |
| Y15                   | Control | 0.00               | 0.00 | 0.00 | 0.00 | 0.00 | 0.00 | 0.00 | 0.47 | 0.33 | 0.00 | 0.00 | 0.00 | 0.00 | 0.00 | 0.00 | 0.00 | 0.00 |
| Y27                   | Control | 0.00               | 0.00 | 0.00 | 0.59 | 0.00 | 0.00 | 0.00 | 0.00 | 0.00 | 0.00 | 0.00 | 0.00 | 0.00 | 0.00 | 0.00 | 0.00 | 0.00 |
| Y44                   | Control | 0.00               | 0.00 | 0.00 | 0.08 | 0.49 | 0.00 | 0.00 | 0.00 | 0.00 | 0.36 | 0.00 | 0.00 | 0.00 | 0.00 | 0.00 | 0.00 | 0.00 |
| Z09                   | Control | 0.00               | 0.00 | 0.00 | 0.00 | 0.00 | 0.00 | 0.00 | 0.00 | 0.00 | 1.54 | 0.00 | 0.47 | 0.00 | 0.00 | 0.00 | 0.00 | 0.00 |
| Z10                   | Control | 0.32               | 0.00 | 0.00 | 0.53 | 0.00 | 0.16 | 0.00 | 0.00 | 0.00 | 0.68 | 0.00 | 0.00 | 0.00 | 0.00 | 0.00 | 0.00 | 0.00 |
| Z13                   | Control | 0.37               | 0.00 | 0.00 | 0.28 | 0.00 | 0.00 | 0.00 | 0.53 | 0.00 | 0.64 | 0.00 | 0.00 | 0.00 | 0.00 | 0.00 | 0.00 | 0.00 |
| Z15                   | Control | 0.56               | 0.00 | 0.00 | 0.58 | 0.20 | 0.00 | 0.00 | 0.00 | 0.00 | 0.32 | 0.00 | 0.00 | 0.00 | 0.00 | 0.00 | 0.00 | 0.00 |
| A10                   | Control | 0.00               | 0.00 | 0.00 | 0.00 | 0.00 | 0.27 | 0.00 | 0.00 | 0.00 | 0.32 | 0.00 | 0.00 | 0.00 | 0.00 | 0.00 | 0.00 | 0.00 |
| A16                   | Control | 0.19               | 0.00 | 0.00 | 0.00 | 0.00 | 0.00 | 0.00 | 0.29 | 0.00 | 0.96 | 0.00 | 0.00 | 0.00 | 0.00 | 0.00 | 0.00 | 0.00 |
| A23                   | Control | 0.44               | 0.00 | 0.00 | 0.15 | 0.00 | 0.00 | 0.00 | 0.00 | 0.00 | 0.90 | 0.00 | 0.00 | 0.00 | 0.00 | 0.00 | 0.00 | 0.00 |
| A34                   | Control | 0.14               | 0.00 | 0.00 | 0.04 | 0.97 | 0.12 | 0.00 | 0.00 | 0.00 | 0.47 | 0.00 | 0.00 | 0.00 | 0.10 | 0.00 | 0.00 | 0.00 |
| A38                   | Control | 0.00               | 0.07 | 0.00 | 0.00 | 0.00 | 0.07 | 0.00 | 0.00 | 0.00 | 0.24 | 0.00 | 0.00 | 0.07 | 0.00 | 0.00 | 0.00 | 0.00 |
| B04                   | Control | 0.73               | 0.00 | 0.00 | 0.19 | 0.00 | 0.00 | 0.00 | 0.17 | 0.00 | 1.15 | 0.00 | 0.00 | 0.08 | 0.00 | 0.00 | 0.00 | 0.00 |
| B17                   | Control | 0.00               | 0.00 | 0.00 | 0.00 | 0.20 | 0.00 | 0.00 | 0.00 | 0.00 | 0.00 | 0.00 | 0.00 | 0.00 | 0.00 | 0.00 | 0.00 | 0.00 |
| B26                   | Control | 0.00               | 0.00 | 0.00 | 0.08 | 0.40 | 0.44 | 0.00 | 0.00 | 0.24 | 1.47 | 0.00 | 0.00 | 0.00 | 0.00 | 0.00 | 0.00 | 0.00 |
| B27                   | Control | 0.00               | 0.00 | 0.00 | 0.08 | 0.50 | 0.21 | 0.00 | 0.00 | 0.42 | 1.33 | 0.00 | 0.00 | 0.12 | 0.00 | 0.00 | 0.00 | 0.00 |
| B28                   | Control | 0.00               | 0.00 | 0.00 | 0.30 | 0.33 | 0.00 | 0.00 | 0.00 | 0.00 | 2.13 | 0.00 | 0.00 | 0.00 | 0.00 | 0.00 | 0.00 | 0.00 |
| B31                   | Control | 0.00               | 0.00 | 0.00 | 0.09 | 0.51 | 0.00 | 0.00 | 0.00 | 0.00 | 0.85 | 0.00 | 0.00 | 0.00 | 0.00 | 0.00 | 0.00 | 0.00 |
| B44                   | Control | 0.00               | 0.00 | 0.00 | 0.51 | 1.57 | 0.00 | 0.00 | 0.00 | 0.26 | 0.00 | 0.00 | 0.00 | 0.00 | 0.00 | 0.00 | 0.00 | 0.00 |
| C36                   | Control | 0.54               | 0.00 | 0.00 | 0.00 | 0.00 | 0.00 | 0.00 | 0.00 | 0.00 | 0.86 | 0.00 | 0.00 | 0.00 | 0.00 | 0.00 | 0.00 | 0.00 |
| C63                   | Control | 0.00               | 0.00 | 0.00 | 0.06 | 0.15 | 0.00 | 0.00 | 0.00 | 0.00 | 0.80 | 0.00 | 0.00 | 0.00 | 0.00 | 0.00 | 0.00 | 0.00 |
| C64                   | Control | 0.00               | 0.00 | 0.00 | 0.14 | 1.10 | 0.00 | 0.00 | 1.33 | 0.00 | 2.08 | 0.00 | 0.00 | 0.00 | 0.00 | 0.00 | 0.00 | 0.00 |
| B71                   | Control | 0.00               | 0.00 | 0.00 | 0.00 | 0.00 | 0.00 | 0.00 | 0.00 | 0.00 | 0.78 | 0.00 | 0.00 | 0.00 | 0.00 | 0.00 | 0.00 | 0.00 |
| B73                   | Control | 0.00               | 0.00 | 0.00 | 0.00 | 0.00 | 0.00 | 0.00 | 0.00 | 0.00 | 0.89 | 0.00 | 0.00 | 0.00 | 0.00 | 0.00 | 0.00 | 0.00 |
| B75                   | Control | 0.41               | 0.00 | 0.00 | 0.12 | 0.80 | 0.00 | 0.00 | 0.00 | 0.00 | 0.00 | 0.00 | 0.00 | 0.00 | 0.00 | 0.00 | 0.00 | 0.00 |
| C04                   | Control | 0.39               | 0.00 | 0.00 | 0.04 | 0.00 | 0.00 | 0.00 | 0.00 | 0.14 | 1.36 | 0.00 | 0.00 | 0.00 | 0.00 | 0.00 | 0.00 | 0.00 |
| C33                   | Control | 0.00               | 0.00 | 0.00 | 0.00 | 0.24 | 0.62 | 0.00 | 0.00 | 0.19 | 1.63 | 0.00 | 0.00 | 0.00 | 0.00 | 0.00 | 0.00 | 0.00 |
| C66                   | Control | 0.27               | 0.00 | 0.00 | 0.13 | 0.81 | 0.54 | 0.00 | 0.76 | 0.00 | 0.60 | 0.00 | 0.00 | 0.00 | 0.00 | 0.00 | 0.00 | 0.00 |
| C70                   | Control | 0.00               | 0.00 | 0.00 | 0.44 | 0.38 | 0.00 | 0.00 | 0.00 | 0.00 | 0.00 | 0.00 | 0.00 | 0.00 | 0.00 | 0.00 | 0.00 | 0.00 |
| C71                   | Control | 0.00               | 0.00 | 0.00 | 0.06 | 0.48 | 0.17 | 0.00 | 0.00 | 0.28 | 0.00 | 0.00 | 0.00 | 0.00 | 0.00 | 0.00 | 0.00 | 0.00 |
| C75                   | Control | 0.00               | 0.00 | 0.00 | 0.00 | 0.12 | 0.00 | 0.00 | 0.00 | 0.17 | 0.34 | 0.00 | 0.00 | 0.00 | 0.00 | 0.00 | 0.00 | 0.00 |

<sup>1</sup>For details of viruses, see Table 1. Viral loads are presented as log<sub>10</sub> viral reads per million total reads per kilobase of target sequence.

<sup>2</sup>See Table S1 for full details of Clinch River pheasantshells used in the analyses.
